# Supplementary material
Source: HighWire-hosted journal article supplement (https://rc.rcjournal.com/highwire/filestream/21543/field_highwire_adjunct_files/0/rc-08957-File001.docx)
Supplement: rc-08957-File001.docx [file rc-08957-File001.docx]

**Table 1S.** Linear regression for ventilatory variables with EELV measurement and calculations.

|  | Tidal volume, mL | |  | Respiratory rate, /min | |  | VCO2, mL/min | |
| --- | --- | --- | --- | --- | --- | --- | --- | --- |
| Timing / SBT parameter | β (95% CI) | *P* value |  | β (95% CI) | *P* value |  | β (95% CI) | *P* value |
| Beginning of SBT |  |  |  |  |  |  |  |  |
| EELV at PEEP 0, per 100 mL | 2.27 (-2.83, 7.37) | .38 |  | -0.15 (-0.45, 0.15) | .32 |  | 2.80 (0.01, 5.60) | .005 |
| EELV/PBW at PEEP 0, mL | 0.63 (-2.46, 3.72) | .68 |  | -0.07 (-0.26, 0.11) | .41 |  | 1.43 (-0.27, 3.13) | .10 |
| EELV at PEEP 5, per 100 mL | 1.34 (-2.42, 5.10) | .48 |  | -0.10 (-0.32, 0.12) | .36 |  | 2.58 (0.58, 4.58) | .01 |
| EELV/PBW at PEEP 5, mL | 0.19 (-2.07, 2.45) | .87 |  | -0.05 (-0.18, 0.08) | .46 |  | 1.43 (0.23, 2.64) | .02 |
| EELV at PEEP 5-EELV at PEEP 0, per 100 mL | 0.36 (-6.43, 7.16) | .92 |  | -0.07 (-0.47, 0.33) | .73 |  | 3.44 (-0.28, 7.16) | .07 |
| End of SBT |  |  |  |  |  |  |  |  |
| EELV at PEEP 0, per 100 mL | 1.72 (-3.18, 6.62) | .48 |  | -0.22 (-0.48, 0.05) | .11 |  | 1.03 (-1.05, 3.11) | .32 |
| EELV/PBW at PEEP 0, mL | 0.51 (-2.45, 3.47) | .73 |  | -0.11 (-0.27, 0.05) | .17 |  | 0.31 (-0.95, 1.58) | .62 |
| EELV at PEEP 5, per 100 mL | 3.94 (-1.06, 8.93) | .12 |  | -0.26 (-0.53, 0.02) | .07 |  | 2.02 (-0.08, 4.13) | .06 |
| EELV/PBW at PEEP, mL 5 | 1.41 (-1.61, 4.43) | .35 |  | -0.13 (-0.29, 0.04) | .14 |  | 0.75 (-0.54, 2.03) | .25 |
| EELV at PEEP 5-EELV at PEEP 0, per 100 mL | 5.92 (-2.58, 14.42) | .17 |  | -0.06 (-0.55, 0.43) | .80 |  | 2.58 (-1.05, 6.21) | .16 |

Abbreviation: β: regression coefficient; CI: confidence interval; SBT: spontaneous breathing trial; EELV: end-expiratory lung volume; PEEP: positive end-expiratory pressure; PBW: predicted body weight;
